# Supplementary material for: Water vapor recovery device designed with interface local heating principle and its application in clean water production
Source: Royal Society of Chemistry journal article supplement (doi:10.1039/d1ta00078k), 2021-01-01
Supplement: d1ta00078k1.pdf [file d1ta00078k1.pdf]

# Water vapor recovery device designed with interface local heating principle and its application in clean water production

Bo Ge<sup>a</sup>, Shaowang Tang<sup>a</sup>, Hao Zhang<sup>a</sup>, Wenzhi Li<sup>a\*</sup>, Min Wang<sup>a</sup>, Guina Ren<sup>b</sup>, Zhaozhu Zhang<sup>c\*</sup>

<sup>a</sup> School of Materials Science and Engineering, Liaocheng University, Liaocheng 252000, China.

<sup>b</sup> School of Environmental and Material Engineering, Yantai University, Yantai 264405, China.

<sup>c</sup> State Key Laboratory of Solid Lubrication, Lanzhou Institute of Chemical Physics, Chinese Academy of Sciences, Lanzhou 730000, China.

## References in the Fig. 7d are as follows:

[1] Y.C. Wang, C.Z. Wang, X.J. Song, S.K. Megarajan, H.Q. Jiang, A facile nanocomposite strategy to fabricate a rGO-MWCNT photothermal layer for efficient water evaporation, *J. Mater. Chem. A* 6 (2018) 963-971.

[2] Y.C. Wang, C.Z. Wang, X.J. Song, M.H. Huang, S.K. Megarajan, S.F. Shaukat, H.Q. Jiang, Improved light-harvesting and thermal management for efficient solar-driven water evaporation using 3D photothermal cones, *J. Mater. Chem. A* 6 (2018) 9874-9881.

[3] F.B. Zhu, L.Q. Wang, B. Demir, M. An, Z.L. Wu, J. Yin, R. Xiao, Q. Zheng, J. Qian, Accelerating solar desalination in brine through ions activated hierarchically porous polyion complex hydrogels, *Mater. Horiz.* (2020) DOI: 10.1039/D0MH01259A.

[4] Y. Xia, Y. Li, S. Yuan, M.P. Jian, Q.F. Hou, L. Gao, H.T. Wang, X.W. Zhang, A self-rotating solar evaporator for continuous and efficient desalination of hypersaline

\* Corresponding authors.

E-mail addresses: [liwenzhilcu@163.com](mailto:liwenzhilcu@163.com) (W. Li); [zhanglicp@163.com](mailto:zhanglicp@163.com) (Z. Zhang)

brine, J. Mater. Chem. A 8 (2020) 16212-16217.

[5] C. Liu, K. Hong, X. Sun, A. Natan, P.C. Luan, Y. Yang, H.L. Zhu, An ‘antifouling’ porous loofah sponge with internal microchannels as solar absorbers and water pumpers for thermal desalination, J. Mater. Chem. A 8 (2020) 12323-12333.

[6] D.D. Qin, Y.J. Zhu, R.L. Yang, Z.C. Xiong, A salt-resistant Janus evaporator assembled from ultralong hydroxyapatite nanowires and nickel oxide for efficient and recyclable solar desalination, Nanoscale 12 (2020) 6717.

[7] X.N. Han, L.L. Zang, S.C. Zhang, T.W. Dou, L. Li, J. Yang, L.G. Sun, Y.H. Zhang, C. Wang, Hydrophilic polymer-stabilized porous composite membrane for water evaporation and solar desalination, RSC Adv. 10 (2020) 2507-2512.

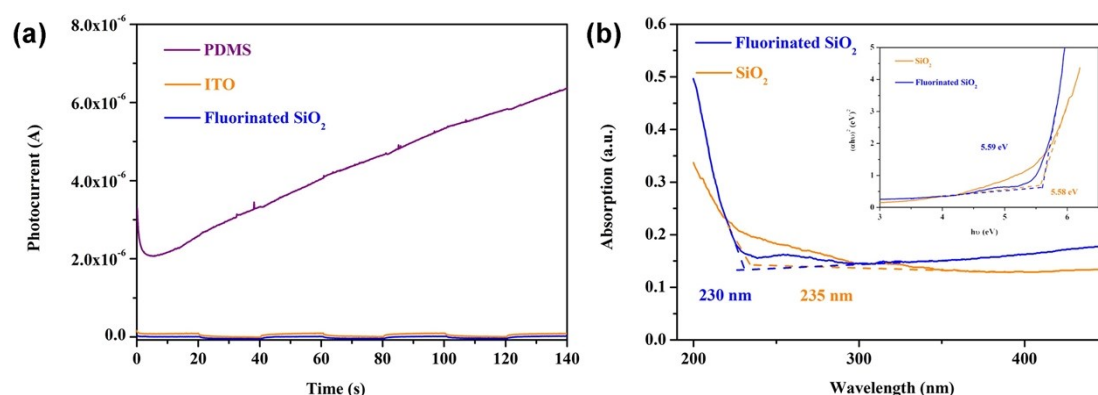

**Fig. S1** Photocurrent analysis of ITO, PDMS and fluorinated SiO<sub>2</sub> (a). Band-gap analysis of SiO<sub>2</sub>

before and after modification (b).

The role of PDMS is simply to bond fluorinated SiO<sub>2</sub> and BiOBr to melamine sponge. Besides, the PDMS electrode was prepared to explore the photoelectric response of PDMS. 0.07 g PDMS and 0.0223 g curing agent were dissolved in 1 ml ethyl acetate. Then, 100  $\mu$ l of the above solution was added to the surface of ITO

conductive glass and solidified at 120 °C for 4 h. The electrode of fluorinated SiO<sub>2</sub> was prepared by dispersing 6 mg of fluorinated SiO<sub>2</sub> into Nafion ethanol solution and ultrasonic treatment for 5 min. Next, 100 µl of the above solution was added to the conductive glass and solidified at 40 °C for 12 h. It can be seen from the Fig. S1a that the PDMS electrode does not exhibit the steps of the photocurrent, confirming that the carrier cannot be transferred to the PDMS surface. The fluorinated SiO<sub>2</sub> electrode has a weak photoelectric response; however, its photoelectric response is less than that of ITO glass. This is because the white silica surface hinders partial light absorption, resulting in a weak photoelectric response. It is also verified that the fluorinated SiO<sub>2</sub> has no photoelectric response. DRS of SiO<sub>2</sub> before and after fluorination were analyzed to explore the band structure of SiO<sub>2</sub> more intuitively. As shown in Fig. S1b, the absorption band edge value before and after fluorination is reduced from 235 nm to 230 nm. Furthermore,  $(\alpha h\nu)^2$  and  $h\nu$  are taken as the vertical coordinate and the horizontal coordinate, respectively. The band gap of SiO<sub>2</sub> increased from 5.58 eV to 5.59 eV.

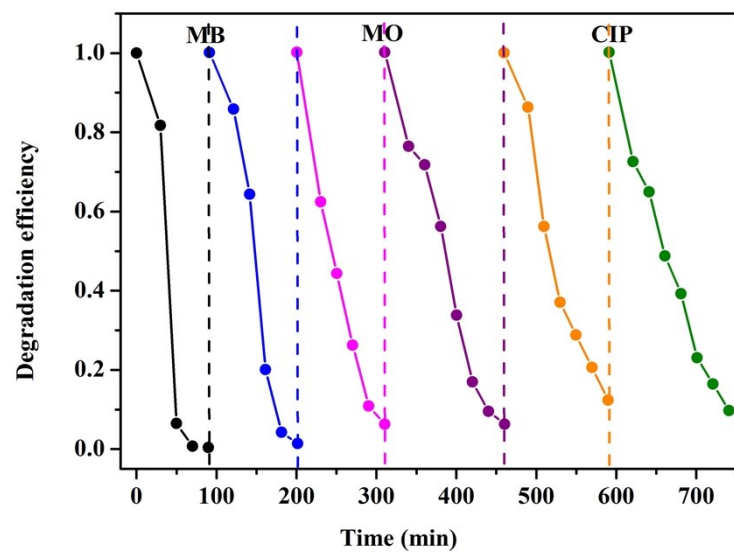

**Fig. S2** Photodegradation curves of SH-Bi sponge for various pollutants (MB, MO and CIP).
